# Supplementary material for: Body composition after allogeneic haematopoietic cell transplantation/total body irradiation in children and young people: a restricted systematic review
Source: Springer Nature journal article supplement (doi:10.1007/s11764-020-00871-1), 2020-05-09
Supplement: MOESM1 [file 17967336]

Supplementary file 1: Search terms

**Changes in body composition after allogeneic haematopoietic stem cell transplantation (HSCT) with total body irradiation (TBI) for treatment of leukaemia in children, teenagers and young adults (CTYA): a restricted systematic review**

**Submitted to: Journal of Cancer Survivorship**

Dr Ava Lorenc, Prof Julian Hamilton-Shield, Dr Rachel Perry, Prof Michael Stevens on behalf of the CTYA HSCT Adipose and Muscle late effects working group\*

\*Corresponding author

Tel: 07796 146440

[m.stevens@bristol.ac.uk](mailto:m.stevens@bristol.ac.uk)

Medline:

1. Lipodystro\*.ti,ab.
  2. Exp lipodystrophy/
  3. (visceral adj1 fat).ti,ab.
  4. (central adj1 fat).ti,ab.
  5. Exp body fat distribution/
  6. (fat adj1 distribut\*).ti,ab.
  7. (fat adj1 compart\*).ti,ab.
  8. Exp Abdominal Fat/
  9. (abdominal adj1 fat).ti,ab.
  10. (abdominal adj1 obes\*).ti,ab.
  11. (Body adj1 composition).ti,ab.
  12. exp body composition/
  13. exp Waist-Hip Ratio/
  14. (waist adj1 hip adj1 ratio).ti,ab.
  15. exp body mass index/
  16. (body adj1 mass adj1 index).ti,ab.
  17. BMI.ti,ab.
  18. Frailty.ti,ab.
  19. Exp Frailty/
  20. Sarcopen\*.ti,ab.
  21. Exp Muscular atrophy/
  22. (Muscle adj1 mass).ti,ab.
  23. Body Height/
  24. Height.ti,ab.
25. 1 or 2 or 3 or 4 or 5 or 6 or 7 or 8 or 9 or 10 or 11 or 12 or 13 or 14 or 15 or 16 or 17 or 18 or 19  
or 20 or 21 or 22 or 23 or 24
26. HSCT.ti,ab.
  27. HCT.ti,ab.
  28. (h?ematopoietic adj1 stem adj1 cell adj1 transplant\*).ti,ab.
  29. (h?ematopoietic adj1 cell adj1 transplant\*).ti,ab.
  30. stem cell transplant.ti,ab.
  31. (stem adj1 cell adj1 transplant\*).ti,ab.
  32. Exp Stem Cell Transplantation/
  33. Bone Marrow Transplantation/
  34. BMT.ti,ab.
  35. (bone adj1 marrow adj1 transplant\*).ti,ab.
  36. h?ematocrit.ti,ab.

37. 26 or 27 or 28 or 29 or 30 or 31 or 32 or 33 or 34 or 35

38. 37 NOT 36

39. 25 AND 38

40. exp Animals, Laboratory/

41. exp Animal Experimentation/

42. exp models, Animal/

43. Rodentia/

44. (rat\* or mouse or mice).ti.

45. exp in vitro techniques/

46. in vitro.ti

47. pre-clinical.ti,ab.

48. 38 or 39 or 40 or 41 or 42 or 43 or 44 or 45

49. 39 NOT 48

Google scholar:

(lipodystrophy OR fat OR waist-hip OR BMI OR body mass index OR frailty OR sarcopenia OR muscle OR height) AND (HSCT or stem cell transplant OR bone marrow transplant OR BMT)
